# Supplementary material for: Derivation and validation of a type 2 diabetes treatment selection algorithm for SGLT2-inhibitor and DPP4-inhibitor therapies based on glucose-lowering efficacy: cohort study using trial and routine clinical data
Source: bioRxiv or medRxiv preprint supplement (doi:10.1101/2021.11.11.21265959), 2021-12-02
Supplement: Supplementary file [file media-2.pdf]

| Trial | Trial type                                                                                                          | N SGLT2-inhibitor (final study cohorts) <sup>1</sup>              |       |               |       |             | N DPP4-inhibitor (final study cohorts) <sup>1</sup> |            |        |        |              | Background therapy | Primary outcome(s) | Study time period | Inclusion criteria <sup>2</sup>                                                                                                                                                                                                                               |                                                                                                                                                                    |                                                                             |                                                                                                                                                                                                                                                                                                                                                                                                                                                                                                                                                                                                                                                                                                                                                                                                                                                                                                                                                                                                                                                                                                                                                                                                                                                        |                                                                                                                                                                                                                                                                                                                                                                                                                                                                                                                                                                                                                                                                                                                                                                                                                                                                                                                                          |
|-------|---------------------------------------------------------------------------------------------------------------------|-------------------------------------------------------------------|-------|---------------|-------|-------------|-----------------------------------------------------|------------|--------|--------|--------------|--------------------|--------------------|-------------------|---------------------------------------------------------------------------------------------------------------------------------------------------------------------------------------------------------------------------------------------------------------|--------------------------------------------------------------------------------------------------------------------------------------------------------------------|-----------------------------------------------------------------------------|--------------------------------------------------------------------------------------------------------------------------------------------------------------------------------------------------------------------------------------------------------------------------------------------------------------------------------------------------------------------------------------------------------------------------------------------------------------------------------------------------------------------------------------------------------------------------------------------------------------------------------------------------------------------------------------------------------------------------------------------------------------------------------------------------------------------------------------------------------------------------------------------------------------------------------------------------------------------------------------------------------------------------------------------------------------------------------------------------------------------------------------------------------------------------------------------------------------------------------------------------------|------------------------------------------------------------------------------------------------------------------------------------------------------------------------------------------------------------------------------------------------------------------------------------------------------------------------------------------------------------------------------------------------------------------------------------------------------------------------------------------------------------------------------------------------------------------------------------------------------------------------------------------------------------------------------------------------------------------------------------------------------------------------------------------------------------------------------------------------------------------------------------------------------------------------------------------|
|       |                                                                                                                     | Canagliflozin                                                     |       | Empagliflozin |       | Any SGLT2-i | Sita-gliptin                                        | Alogliptin |        |        | Lina-gliptin |                    |                    |                   |                                                                                                                                                                                                                                                               | Any DPP4-i                                                                                                                                                         |                                                                             |                                                                                                                                                                                                                                                                                                                                                                                                                                                                                                                                                                                                                                                                                                                                                                                                                                                                                                                                                                                                                                                                                                                                                                                                                                                        |                                                                                                                                                                                                                                                                                                                                                                                                                                                                                                                                                                                                                                                                                                                                                                                                                                                                                                                                          |
|       |                                                                                                                     | 100mg                                                             | 300mg | 10mg          | 25mg  |             |                                                     | 100mg      | 6.25mg | 12.5mg |              |                    |                    |                   |                                                                                                                                                                                                                                                               |                                                                                                                                                                    | 25mg                                                                        | 5mg                                                                                                                                                                                                                                                                                                                                                                                                                                                                                                                                                                                                                                                                                                                                                                                                                                                                                                                                                                                                                                                                                                                                                                                                                                                    |                                                                                                                                                                                                                                                                                                                                                                                                                                                                                                                                                                                                                                                                                                                                                                                                                                                                                                                                          |
| 1     | CANTATA-D (NCT01106677)                                                                                             | Efficacy, placebo-controlled and active comparator                | 352   | 353           |       |             | 705                                                 | 355        |        |        |              |                    |                    | 355               | Immediate-release metformin monotherapy (≥2,000 mg/day, or ≥1,500 mg/day if unable to tolerate higher dose).<br><br>(Participants on sulfonylurea in addition to metformin discontinued sulfonylurea.)                                                        | HbA1c change from baseline to 26 weeks                                                                                                                             | April 2010-August 2012                                                      | <ul style="list-style-type: none"> <li>Aged 18-80</li> <li>HbA1c ≥7% and ≤10.5%</li> <li>Currently treated with metformin (maximum dose) alone or combined with sulfonylurea</li> </ul> <b>Exclusion:</b> <ul style="list-style-type: none"> <li>Uncontrolled hyperglycaemia defined as repeated FPG ≥15.5mmol/L</li> <li>Uncontrolled hypertension</li> <li>eGFR &lt;55mL/min (or &lt;60 mL/min if based upon restriction in local label) or serum creatinine ≥124 µmol/L (men) or ≥115 µmol/L (women)</li> <li>Treatment with PPAR-γ agonist, insulin, another SGLT2-inhibitor or any other antihyperglycaemic agents except metformin alone or with sulfonylurea within 12 weeks</li> <li>Cardiovascular disease including MI, unstable angina, revascularisation procedure or cerebrovascular accident within 3 months</li> <li>Severe hypoglycaemia episode within 6 months</li> </ul>                                                                                                                                                                                                                                                                                                                                                            |                                                                                                                                                                                                                                                                                                                                                                                                                                                                                                                                                                                                                                                                                                                                                                                                                                                                                                                                          |
| 2     | CANTATA-D2 (NCT01137812)                                                                                            | Efficacy, placebo-controlled and active comparator                |       | 359           |       |             | 359                                                 | 356        |        |        |              |                    |                    | 356               | Combined metformin and sulfonylurea at maximum- or near-maximum doses (adjusted pre-run in if not already at these doses)                                                                                                                                     | HbA1c change from baseline to 52 weeks                                                                                                                             | June 2010-March 2012                                                        | <ul style="list-style-type: none"> <li>Aged 18+</li> <li>HbA1c ≥7% and ≤10.5%</li> <li>Currently treated with metformin alone or combined with sulfonylurea</li> </ul> <b>Exclusion:</b> <ul style="list-style-type: none"> <li>Uncontrolled hyperglycaemia defined as repeated FPG ≥16.7mmol/L</li> <li>Uncontrolled hypertension</li> <li>eGFR &lt;55mL/min (or &lt;60 mL/min if based upon restriction in local label) or serum creatinine ≥124 µmol/L (men) or ≥115 µmol/L (women)</li> <li>Treatment with PPAR-γ agonist, insulin, another SGLT2-inhibitor or any other antihyperglycaemic agents except metformin and sulfonylurea within 12 weeks</li> <li>History of cardiovascular disease</li> <li>Severe hypoglycaemia episode within 6 months</li> </ul>                                                                                                                                                                                                                                                                                                                                                                                                                                                                                   |                                                                                                                                                                                                                                                                                                                                                                                                                                                                                                                                                                                                                                                                                                                                                                                                                                                                                                                                          |
| 3     | EMPA-REG MONO (B1245.20; NCT01177813)                                                                               | Efficacy, placebo-controlled and active comparator                |       |               | 214   | 291         | 505                                                 | 219        |        |        |              |                    |                    | 219               | None (drug-naïve)                                                                                                                                                                                                                                             | HbA1c change from baseline to 24 weeks                                                                                                                             | August 2010-March 2012                                                      | <ul style="list-style-type: none"> <li>Aged 18+ (20+ in Japan only)</li> <li>HbA1c ≥7% and ≤10%</li> <li>BMI ≤45kg/m<sup>2</sup></li> <li>Drug-naïve to antihyperglycaemic agents</li> </ul> <b>Exclusion:</b> <ul style="list-style-type: none"> <li>Uncontrolled hyperglycaemia after overnight fast during placebo run-in</li> <li>eGFR &lt;50mL/min at screening/placebo run-in</li> <li>Current treatment with systemic steroids or change in dosage of thyroid hormones within 6 weeks or any uncontrolled endocrine disorder except T2D</li> <li>Treatment with anti-obesity medication/other treatment leading to unstable body weight</li> <li>Any acute coronary syndrome], stroke, TIA within 3 months</li> <li>Bariatric/other GI surgeries within 2 years</li> <li>History of cancer</li> <li>Any disorders causing haemolysis or unstable red blood cells</li> </ul>                                                                                                                                                                                                                                                                                                                                                                     |                                                                                                                                                                                                                                                                                                                                                                                                                                                                                                                                                                                                                                                                                                                                                                                                                                                                                                                                          |
| 4     | CANTATA-SU (NCT00968812)                                                                                            | Efficacy, active comparator (sulfonylurea)                        | 470   | 469           |       |             | 939                                                 |            |        |        |              |                    |                    |                   | Immediate-release metformin monotherapy (≥2,000 mg/day, or ≥1,500 mg/day if unable to tolerate higher dose).<br><br>(Participants on combined metformin and a second antihyperglycaemic agent (not TZD as per inclusion criteria) discontinued second agent.) | HbA1c change from baseline to 52 weeks                                                                                                                             | August 2009-December 2011 (core period) or January 2013 (52-week extension) | <ul style="list-style-type: none"> <li>Aged 18-80</li> <li>HbA1c ≥7% and ≤9.5%</li> <li>BMI ≥22 and ≤45kg/m<sup>2</sup></li> <li>Currently treated with metformin (maximum dose) alone or combined with another antihyperglycaemic agent</li> </ul> <b>Exclusion:</b> <ul style="list-style-type: none"> <li>Uncontrolled hyperglycaemia defined as repeated FPG ≥15mmol/L</li> <li>History of active proliferative diabetic retinopathy</li> <li>eGFR &lt;55mL/min (or &lt;60 mL/min if based upon restriction in local label) or serum creatinine ≥124 µmol/L (men) or ≥115 µmol/L (women)</li> <li>Treatment with TZD within 16 weeks</li> <li>Hereditary glucose-galactose malabsorption or primary renal glucosuria</li> <li>Renal disease requiring immunosuppressive therapy within 12 months or a history of dialysis or renal transplant</li> <li>Severe hypoglycaemia episode within 6 months</li> </ul>                                                                                                                                                                                                                                                                                                                                     |                                                                                                                                                                                                                                                                                                                                                                                                                                                                                                                                                                                                                                                                                                                                                                                                                                                                                                                                          |
| 5     | CANTATA-M (NCT01081834)                                                                                             | Efficacy, placebo-controlled                                      | 229   | 230           |       |             | 459                                                 |            |        |        |              |                    |                    |                   | None (participants on antihyperglycaemic agents as per inclusion criteria discontinued these)                                                                                                                                                                 | HbA1c change from baseline to 26 weeks                                                                                                                             | March 2010-March 2012                                                       | <ul style="list-style-type: none"> <li>Aged 18-80</li> <li>Main study: HbA1c ≥7% and ≤10% on no antihyperglycaemic agent/HbA1c ≥6.5% and ≤9.5% on antihyperglycaemic agent monotherapy or combined low dose metformin and sulfonylurea; FPG ≤15mmol/L</li> <li>High Glycaemic Substudy: HbA1c &gt;10% and ≤12% and FPG ≤19.4mmol/L</li> </ul> <b>Exclusion:</b> <ul style="list-style-type: none"> <li>eGFR &lt;50mL/min</li> <li>Treatment with PPAR-γ agonist, insulin, another SGLT2-inhibitor or any other antihyperglycaemic agents except as specified above within 12 weeks</li> <li>Cardiovascular disease including MI, unstable angina, revascularisation procedure or cerebrovascular accident within 3 months</li> <li>Hereditary glucose-galactose malabsorption or primary renal glucosuria</li> <li>Severe hypoglycaemia episode within 6 months</li> </ul>                                                                                                                                                                                                                                                                                                                                                                             |                                                                                                                                                                                                                                                                                                                                                                                                                                                                                                                                                                                                                                                                                                                                                                                                                                                                                                                                          |
| 6     | Efficacy, Safety, and Tolerability of Canagliflozin vs. Placebo in the Treatment of Older Subjects... (NCT01106651) | Efficacy, placebo-controlled                                      | 236   | 228           |       |             | 303                                                 |            |        |        |              |                    |                    |                   | Any (usual care)                                                                                                                                                                                                                                              | HbA1c change from baseline to 26 weeks                                                                                                                             | April 2010-November 2011 (core period) or June 2013 (78-week extension)     | <ul style="list-style-type: none"> <li>Aged 55-80 (women at least 3 years postmenopausal)</li> <li>HbA1c ≥7% and ≤10%</li> <li>BMI ≥20 and ≤40kg/m<sup>2</sup></li> <li>Fasting fingerstick blood glucose ≥6.1mmol/L</li> </ul> <b>Exclusion:</b> <ul style="list-style-type: none"> <li>Uncontrolled hyperglycaemia defined as repeated FPG ≥15mmol/L</li> <li>Uncontrolled hypertension</li> <li>eGFR &lt;50mL/min</li> <li>On metformin and serum creatinine ≥124 µmol/L (men) or ≥115 µmol/L (women)</li> <li>Cardiovascular disease including MI, unstable angina, revascularisation procedure or cerebrovascular accident within 3 months</li> <li>History of New York Heart Association Class III-IV cardiac disease</li> <li>Severe hypoglycaemia episode within 6 months</li> </ul>                                                                                                                                                                                                                                                                                                                                                                                                                                                           |                                                                                                                                                                                                                                                                                                                                                                                                                                                                                                                                                                                                                                                                                                                                                                                                                                                                                                                                          |
| 7     | CANTATA-MSU (NCT01106625)                                                                                           | Efficacy, placebo-controlled                                      | 149   | 154           |       |             | 303                                                 |            |        |        |              |                    |                    |                   | Combined metformin and sulfonylurea at maximum- or near-maximum doses (adjusted pre-run in if not already at these doses)                                                                                                                                     | HbA1c change from baseline to 26 weeks                                                                                                                             | April 2010-April 2012                                                       | <ul style="list-style-type: none"> <li>Aged 18-80</li> <li>HbA1c ≥7% and ≤10.5%</li> <li>Currently treated with combined metformin and sulfonylurea</li> </ul> <b>Exclusion:</b> <ul style="list-style-type: none"> <li>Uncontrolled hyperglycaemia defined as repeated FPG ≥15mmol/L</li> <li>Uncontrolled hypertension</li> <li>eGFR &lt;55mL/min (or &lt;60 mL/min if based upon restriction in local label) or serum creatinine ≥124 µmol/L (men) or ≥115 µmol/L (women)</li> <li>Treatment with any other antihyperglycaemic agents except metformin and sulfonylurea within 12 weeks</li> <li>Severe hypoglycaemia episode within 6 months</li> </ul>                                                                                                                                                                                                                                                                                                                                                                                                                                                                                                                                                                                            |                                                                                                                                                                                                                                                                                                                                                                                                                                                                                                                                                                                                                                                                                                                                                                                                                                                                                                                                          |
| 8     | EMPA-REG PIO (B1245.19; NCT01210001)                                                                                | Efficacy, placebo-controlled                                      |       |               | 159   | 162         | 321                                                 |            |        |        |              |                    |                    |                   | Pioglitazone alone or in combination with metformin                                                                                                                                                                                                           | HbA1c change from baseline to 24 weeks (for any background therapy and for pioglitazone + metformin subset)                                                        | September 2010-April 2012                                                   | <ul style="list-style-type: none"> <li>Aged 18+</li> <li>B1245.19: HbA1c ≥7% and ≤10%; B1245.23: ≤11% for randomised arm, &gt;11% for open-label arm</li> <li>BMI ≤45kg/m<sup>2</sup></li> <li>Current treatment matches trial background therapy</li> </ul> <b>Exclusion:</b> <ul style="list-style-type: none"> <li>Uncontrolled hyperglycaemia after overnight fast during placebo run-in</li> <li>eGFR &lt;30mL/min at screening/placebo run-in</li> <li>Current treatment with systemic steroids or change in dosage of thyroid hormones within 6 weeks or any uncontrolled endocrine disorder except T2D</li> <li>Treatment with anti-obesity medication/other treatment leading to unstable body weight</li> <li>MI, stroke, TIA within 3 months</li> <li>Bariatric/other GI surgeries within 2 years</li> <li>History of cancer</li> <li>Any disorders causing haemolysis or unstable red blood cells</li> </ul>                                                                                                                                                                                                                                                                                                                               |                                                                                                                                                                                                                                                                                                                                                                                                                                                                                                                                                                                                                                                                                                                                                                                                                                                                                                                                          |
| 9     | EMPA-REG METSU (B1245.23; NCT01159600)                                                                              | Efficacy, placebo-controlled                                      |       |               | 434   | 581         | 1,015                                               |            |        |        |              |                    |                    |                   | Immediate-release metformin (≥1500mg/day or maximum dose) alone or in combination with sulfonylurea (≥half maximum dose)                                                                                                                                      | HbA1c change from baseline to 24 weeks                                                                                                                             | July 2010-February 2012                                                     | <ul style="list-style-type: none"> <li>MI, stroke, TIA within 3 months</li> <li>Bariatric/other GI surgeries within 2 years</li> <li>History of cancer</li> <li>Any disorders causing haemolysis or unstable red blood cells</li> </ul>                                                                                                                                                                                                                                                                                                                                                                                                                                                                                                                                                                                                                                                                                                                                                                                                                                                                                                                                                                                                                |                                                                                                                                                                                                                                                                                                                                                                                                                                                                                                                                                                                                                                                                                                                                                                                                                                                                                                                                          |
| 10    | EMPA-REG OUTCOME (B1245.25; NCT01131676)                                                                            | CV outcomes, placebo-controlled                                   |       |               | 1,100 | 1,110       | 2,210                                               |            |        |        |              |                    |                    |                   | Any (usual care)                                                                                                                                                                                                                                              | Time to first occurrence of 3-point MACE (composite of CV death, non-fatal MI, and non-fatal stroke)                                                               | July 2010-April 2015                                                        | <ul style="list-style-type: none"> <li>Aged 18+</li> <li>HbA1c ≥7% and ≤10%, or ≥7% and ≤9% if drug-naïve</li> <li>BMI ≤45kg/m<sup>2</sup></li> <li>High cardiovascular risk defined as ≥1 of the following (all &gt;2 months prior): history of MI; evidence of single-vessel or multi-vessel coronary artery disease; unstable angina with evidence of single- or multi-vessel coronary artery disease; history of stroke (ischemic or hemorrhagic); occlusive peripheral artery disease</li> </ul> <b>Exclusion:</b> <ul style="list-style-type: none"> <li>Uncontrolled hyperglycaemia after overnight fast during placebo run-in</li> <li>eGFR &lt;30mL/min at screening/placebo run-in</li> <li>Planned cardiac surgery or angioplasty within 3 months</li> <li>Current treatment with systemic steroids or change in dosage of thyroid hormones within 6 weeks or any uncontrolled endocrine disorder except T2D</li> <li>Treatment with anti-obesity medication/other treatment leading to unstable body weight</li> <li>Acute coronary syndrome, stroke, TIA within 2 months</li> <li>Bariatric/other GI surgeries within 2 years</li> <li>History of cancer</li> <li>Any disorders causing haemolysis or unstable red blood cells</li> </ul> |                                                                                                                                                                                                                                                                                                                                                                                                                                                                                                                                                                                                                                                                                                                                                                                                                                                                                                                                          |
| 11    | Linagliptin in Combination With Metformin and a Sulfonylurea... (B1218.18; NCT00602472)                             | Efficacy, placebo-controlled                                      |       |               |       |             |                                                     |            |        |        |              |                    | 774                | 774               | Combined metformin (≥1500mg/day or maximum dose) and sulfonylurea (maximum dose)                                                                                                                                                                              | HbA1c change from baseline to 24 weeks                                                                                                                             | February 2008-May 2009                                                      | <ul style="list-style-type: none"> <li>Aged 18-80</li> <li>HbA1c ≥7% and ≤10%</li> <li>BMI ≤40kg/m<sup>2</sup></li> <li>Current treatment matches trial background therapy</li> </ul> <b>Exclusion:</b> <ul style="list-style-type: none"> <li>Renal failure, or renal impairment defined as serum creatinine ≥1.5 mg/dL</li> <li>Treatment with TZD, GLP-1 analogue, or insulin within 3 months</li> <li>Treatment with anti-obesity drugs (sibutramine, rimonabant, orlistat) within 3 months</li> <li>Current treatment with systemic steroids or change in dosage of thyroid hormones within 6 weeks</li> <li>MI, stroke, TIA within 6 months</li> <li>Dehydration</li> <li>Current acute or chronic metabolic acidosis</li> </ul>                                                                                                                                                                                                                                                                                                                                                                                                                                                                                                                 |                                                                                                                                                                                                                                                                                                                                                                                                                                                                                                                                                                                                                                                                                                                                                                                                                                                                                                                                          |
| 12    | Efficacy and Safety of Linagliptin vs. Placebo... (B1218.16; NCT00621140)                                           | Efficacy, placebo-controlled                                      |       |               |       |             |                                                     |            |        |        |              |                    |                    | 326               | 326                                                                                                                                                                                                                                                           | None (participants on antihyperglycaemic agents as per inclusion criteria discontinued these)                                                                      | HbA1c change from baseline to 24 weeks                                      | February 2008-May 2009                                                                                                                                                                                                                                                                                                                                                                                                                                                                                                                                                                                                                                                                                                                                                                                                                                                                                                                                                                                                                                                                                                                                                                                                                                 | <ul style="list-style-type: none"> <li>Aged 18-80</li> <li>HbA1c ≥6.5% and ≤9%, or ≥7% and ≤10% if treatment-naïve</li> </ul> <b>Exclusion:</b> <ul style="list-style-type: none"> <li>Treatment with &gt;1 oral antidiabetic agent within 10 weeks</li> <li>Treatment with TZD, GLP-1 analogue, or insulin within 3 months</li> <li>Treatment with anti-obesity drugs (sibutramine, rimonabant, orlistat) within 3 months</li> <li>Current treatment with systemic steroids or change in dosage of thyroid hormones within 6 weeks</li> <li>MI, stroke, TIA within 6 months</li> </ul>                                                                                                                                                                                                                                                                                                                                                  |
| 13    | Efficacy and Safety of Linagliptin vs. Placebo Added to Metformin Background Therapy... (B1218.17; NCT00601250)     | Efficacy, placebo-controlled                                      |       |               |       |             |                                                     |            |        |        |              |                    |                    | 506               | 506                                                                                                                                                                                                                                                           | Metformin monotherapy (≥1500mg/day or maximum dose).<br><br>(Participants on an additional oral antidiabetic agents as per inclusion criteria discontinued these.) | HbA1c change from baseline to 24 weeks                                      | January 2008-May 2009                                                                                                                                                                                                                                                                                                                                                                                                                                                                                                                                                                                                                                                                                                                                                                                                                                                                                                                                                                                                                                                                                                                                                                                                                                  | <ul style="list-style-type: none"> <li>Aged 18-80</li> <li>HbA1c ≥6.5% and ≤9% if undergoing wash-out of previous medication, or ≥7% and ≤10% otherwise</li> <li>BMI ≤40kg/m<sup>2</sup></li> <li>Currently treated with metformin (maximum dose) alone or combined with another oral antidiabetes agent</li> </ul> <b>Exclusion:</b> <ul style="list-style-type: none"> <li>Renal failure or renal impairment</li> <li>Treatment with TZD, injectable GLP-1 analogue, or insulin within 3 months</li> <li>Treatment with anti-obesity drugs (sibutramine, rimonabant, orlistat) within 3 months</li> <li>Current treatment with systemic steroids or change in dosage of thyroid hormones within 6 weeks</li> <li>MI, stroke, TIA within 6 months</li> <li>Unstable or acute congestive heart failure</li> <li>Dehydration</li> <li>History of acute or chronic metabolic acidosis</li> <li>Hereditary galactose intolerance</li> </ul> |
| 14    | Efficacy and Safety of Linagliptin in Combination With Metformin (B1218.20; NCT00622284)                            | Efficacy, placebo-controlled and active comparator (sulfonylurea) |       |               |       |             |                                                     |            |        |        |              |                    |                    | 759               | 759                                                                                                                                                                                                                                                           | Metformin monotherapy (≥1500mg/day or maximum dose).<br><br>(Participants on an additional oral antidiabetic agents as per inclusion criteria discontinued these.) | HbA1c change from baseline to 52 weeks                                      | February 2008-December 2010                                                                                                                                                                                                                                                                                                                                                                                                                                                                                                                                                                                                                                                                                                                                                                                                                                                                                                                                                                                                                                                                                                                                                                                                                            | <ul style="list-style-type: none"> <li>Aged 18-80</li> <li>HbA1c ≥6% and ≤9% if treated with metformin and another oral antidiabetic agent, or ≥6.5% and ≤10% if treated with metformin alone</li> <li>BMI ≤40kg/m<sup>2</sup></li> <li>Currently treated with metformin (maximum dose) alone or combined with another oral antidiabetes agent</li> </ul> <b>Exclusion:</b> <ul style="list-style-type: none"> <li>Renal failure or renal impairment</li> <li>Treatment with TZD, GLP-1 analogue, or insulin within 3 months</li> <li>MI, stroke, TIA within 6 months</li> </ul>                                                                                                                                                                                                                                                                                                                                                         |

BMI, body mass index; DPP4-(inhibitor), dipeptidyl-peptidase 4 inhibitor; eGFR, estimated glomerular filtration rate; FPG, fasting plasma glucose; GLP-1, glucagon-like peptide-1; HbA1c, glycated haemoglobin, type A1c; MACE, major adverse cardiovascular event; MI, myocardial infarction; PPAR-γ, peroxisome proliferator-activated receptor gamma ; SGLT2-(inhibitor), sodium-glucose cotransporter-2 inhibitor; T2D, Type 2 diabetes; TIA, transient ischaemic attack; TZD, thiazolidinedione.

<sup>1</sup>Ns are participants included in the mixed effects models and subsequent meta-analysis. This includes participants who were not insulin-treated and with at least one on-treatment HbA1c between randomisation and 6 months (trials 3,8,9: HbA1c measurements excluded after changes in study medication (including dose changes); trial 10: HbA1c measurements excluded after changes in study medication (including dose changes) or changes in background medication (not including dose changes). Trials 1,2,4-7: treatment group is as randomised; trials 3,8-14: treatment group is actual study medication given.

<sup>2</sup>All trials:  
• Diagnosis of Type 2 diabetes mellitus  
• Background therapy as stated in table and unchanged for up to 12 weeks prior to randomisation (varies between trials)  
**Exclusion:**  
• (Symptoms of) Type 1 diabetes mellitus or other type of diabetes mellitus  
• Contraindications (according to local market) to assigned background or study medications  
• Liver disease defined by elevated ALT, AST and/or alkaline phosphatase  
• Nursing or pregnant women; or premenopausal women of child bearing potential either intending to become pregnant during the trial period and/or not practicing an acceptable method of birth control  
• History of alcohol or drug abuse  
• Participation in another trial with an investigational drug within preceding 30 days  
• Any other clinical condition that would jeopardise patient safety while participating in this clinical trial
